# Supplementary material for: Simultaneous optimization of CoIr alloy nanoparticles and 2D graphitic-N doped carbon support in CoIr@CN by Ir doping for enhanced oxygen and hydrogen evolution reactions
Source: Royal Society of Chemistry journal article supplement (doi:10.1039/d2ta03496d), 2022-01-01
Supplement: d2ta03496d1.pdf [file d2ta03496d1.pdf]

**Simultaneous optimization of CoIr alloy nanoparticle and 2D graphitic-N doped carbon support in CoIr@CN by Ir doping for enhanced oxygen and hydrogen evolution reaction**

Weibin Chen<sup>a</sup>, Yuxin Xie<sup>a</sup>, Xuehui Gao<sup>b</sup>, Lei Li<sup>a\*</sup>, Zhan Lin<sup>a\*</sup>

<sup>a</sup> Guangdong Provincial Key Laboratory of Plant Resources Biorefinery, School of Chemical Engineering and Light Industry, Guangdong University of Technology, Guangzhou 510006, China

<sup>b</sup> Department of Chemistry, Key Laboratory of the Ministry of Education for Advanced Catalysis Materials, Zhejiang Normal University, Jinhua 321004, China

\*Corresponding authors. E-mail address: li.lei@gdut.edu.cn, [zhanlin@gdut.edu.cn](mailto:zhanlin@gdut.edu.cn)

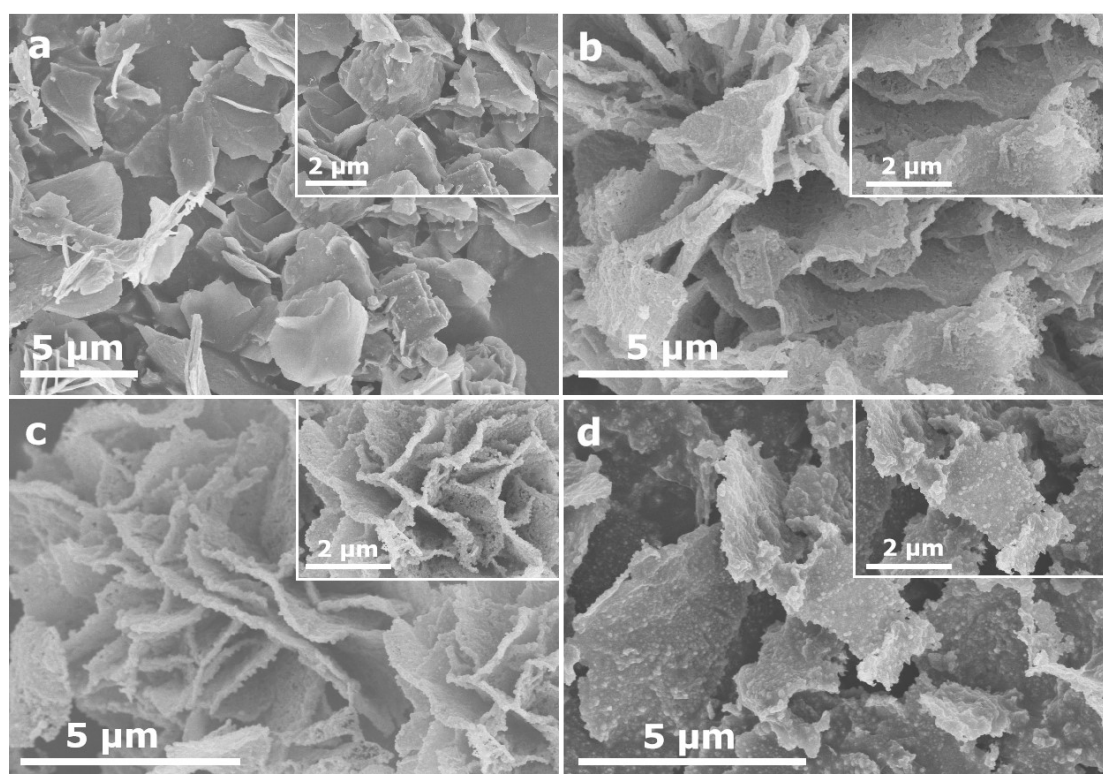

Figure S1. SEM images of (a) Co@CN, (b) CoIr@CN-0.15, (c) CoIr@CN-0.20, and (d) CoIr@CN-0.25.

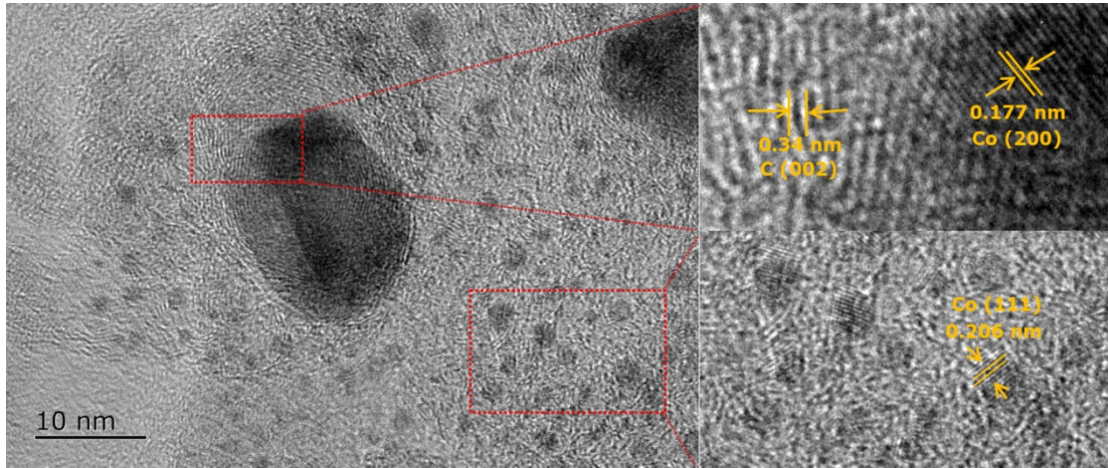

Figure S2. HRTEM images of CoIr@CN-0.20.

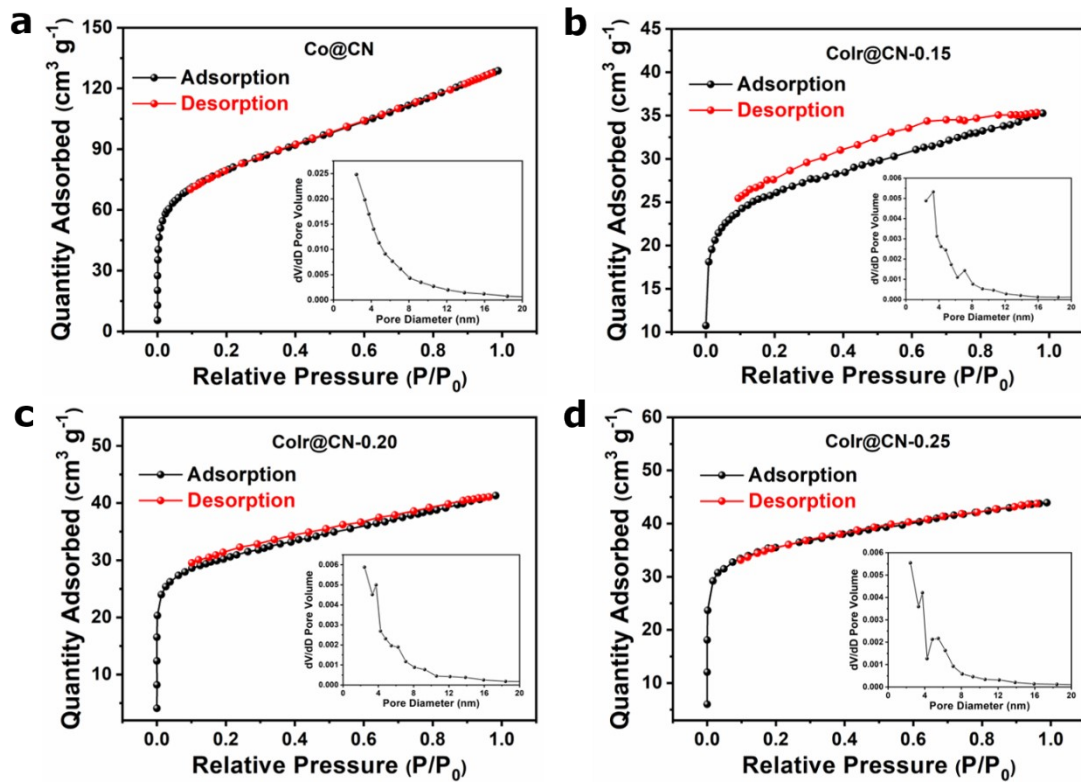

Figure S3. Nitrogen adsorption-desorption isotherms, and (inset) pore size distributions of (a) Co@CN, (b) CoIr@CN-0.15, (c) CoIr@CN-0.20, and (d) CoIr@CN-0.25.

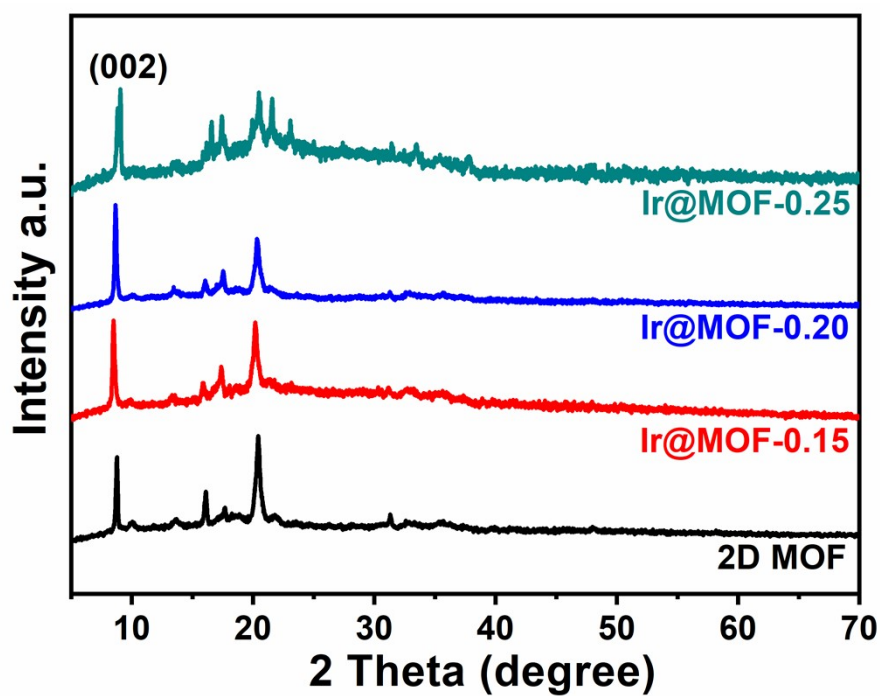

Figure S4. XRD pattern of MOF and Ir@MOF.

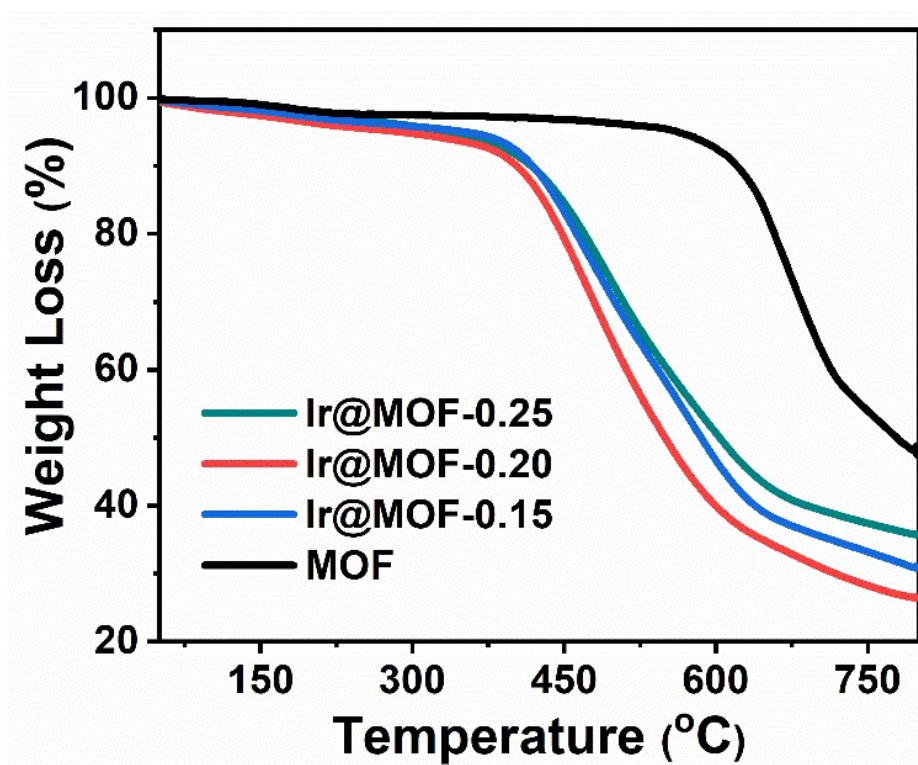

Figure S5. TGA curves of the MOF and Ir@MOF-x ( $x = 0.15, 0.20,$  and  $0.25$ ) under nitrogen atmosphere.

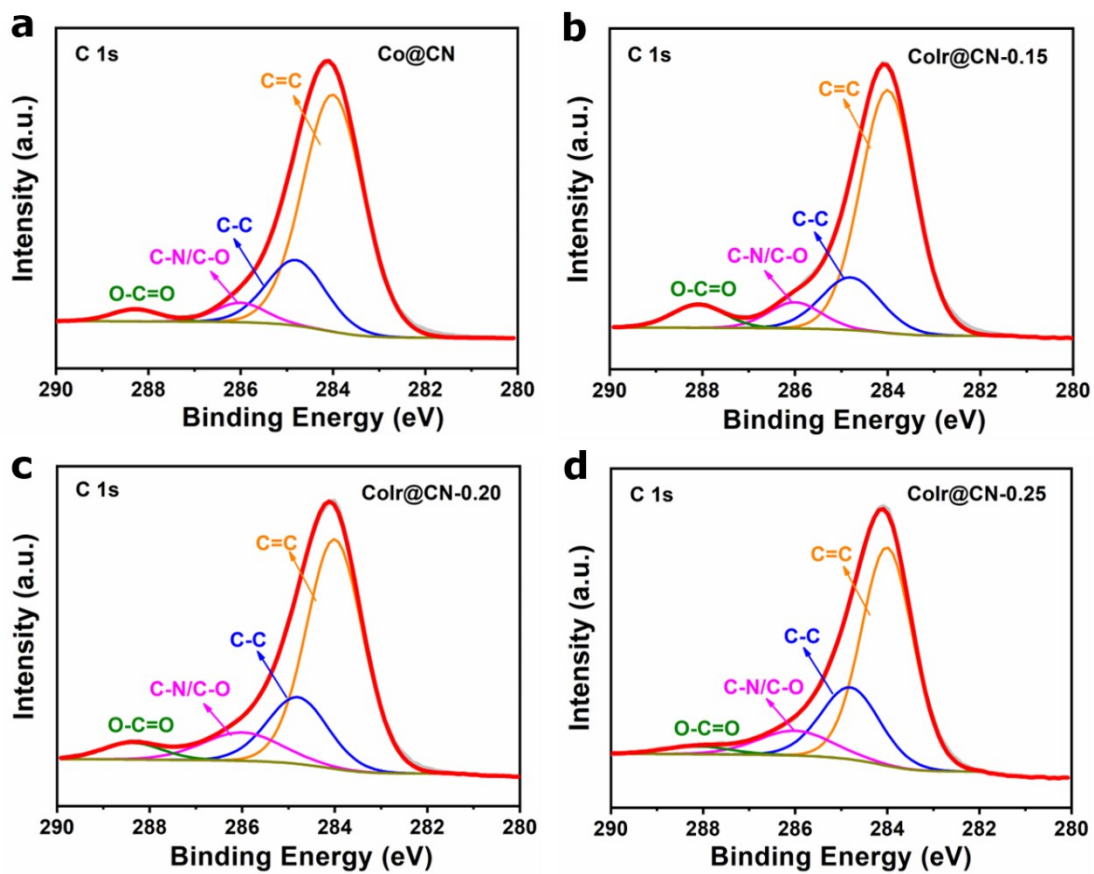

Figure S6. C 1s XPS of (a) Co@CN, (b) CoIr@CN-0.15, (c) CoIr@CN-0.20, and (d) CoIr@CN-0.25.

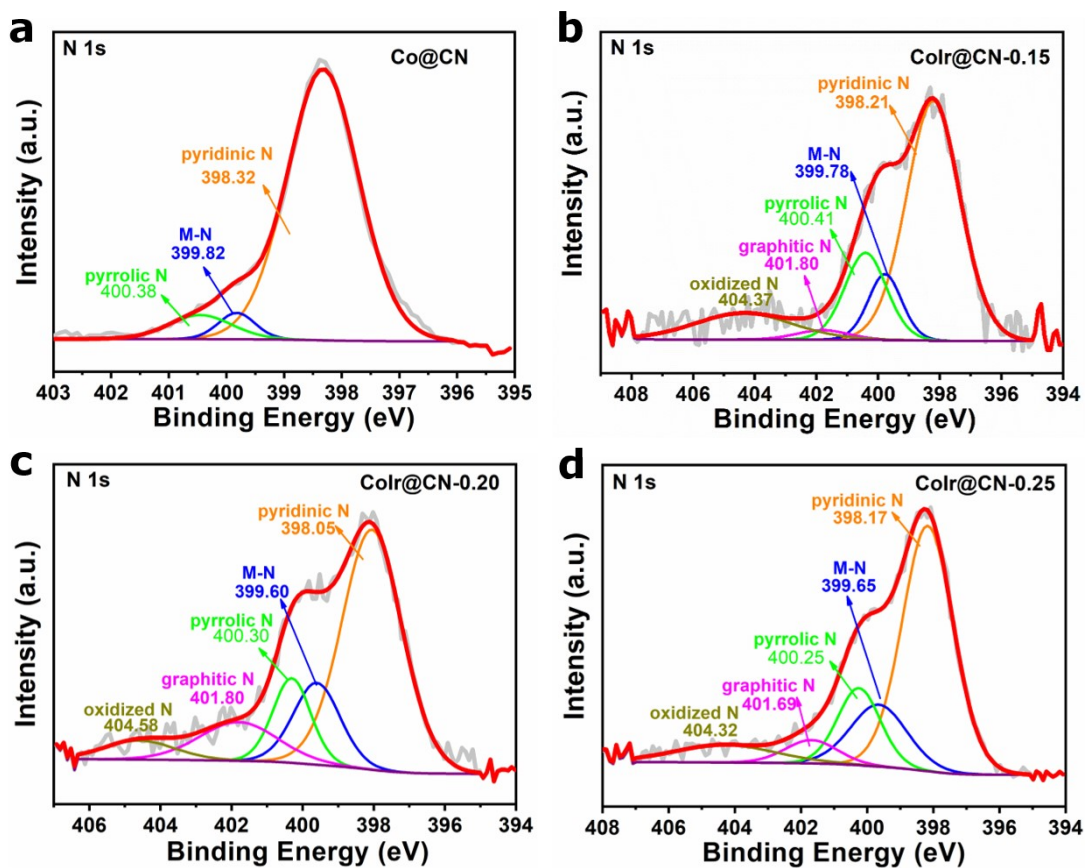

Figure S7. N 1s XPS of (a) Co@CN, (b) CoIr@CN-0.15, (c) CoIr@CN-0.20, and (d) CoIr@CN-0.25.

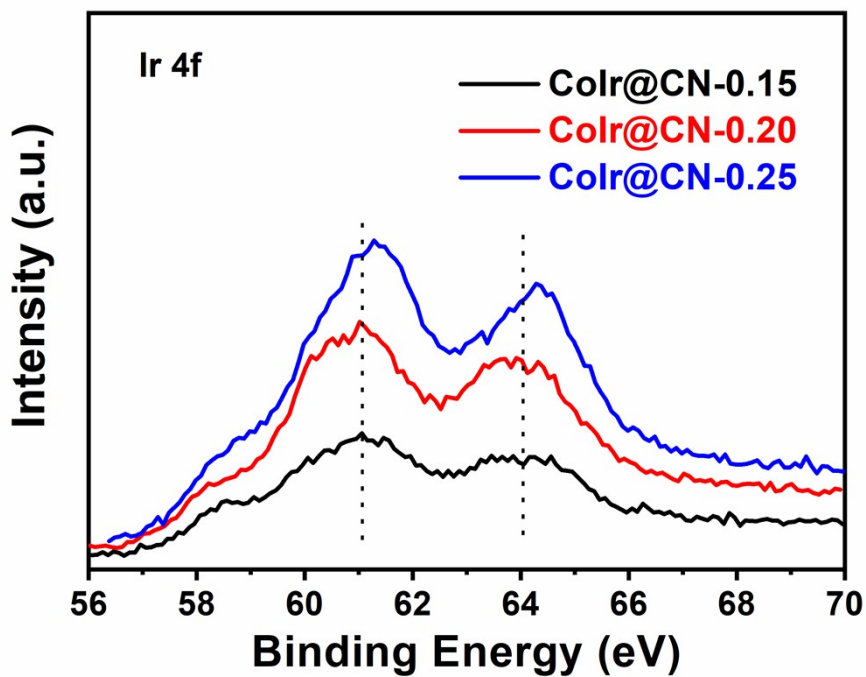

Figure S8. Ir 4f XPS of CoIr@CN-0.15, CoIr@CN-0.20, and CoIr@CN-0.25.

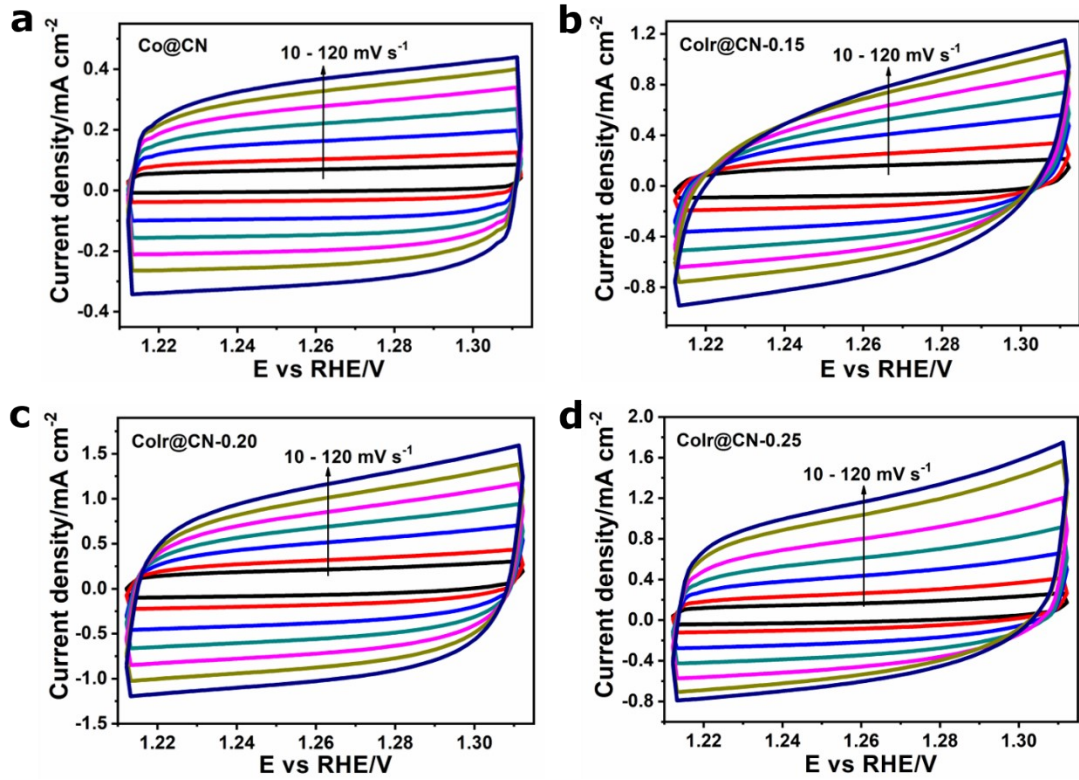

Figure S9. CVs curve of (a) Co@CN, (b) CoIr@CN-0.15, (c) CoIr@CN-0.20, and (d) CoIr@CN-0.25 in 1.0 M KOH for OER.

The corresponding ECSA caculated from  $C_{dl}$ :

$$ECSA_{Co@CN} = \frac{2.74 \text{ mF cm}^{-2}}{40 \mu\text{F cm}^{-2}} = 68.50 \text{ cm}^2$$

$$ECSA_{CoIr@CN-0.15} = \frac{5.45 \text{ mF cm}^{-2}}{40 \mu\text{F cm}^{-2}} = 136.25 \text{ cm}^2$$

$$ECSA_{CoIr@CN-0.20} = \frac{7.37 \text{ mF cm}^{-2}}{40 \mu\text{F cm}^{-2}} = 184.25 \text{ cm}^2$$

$$ECSA_{CoIr@CN-0.25} = \frac{8.56 \text{ mF cm}^{-2}}{40 \mu\text{F cm}^{-2}} = 214.00 \text{ cm}^2$$

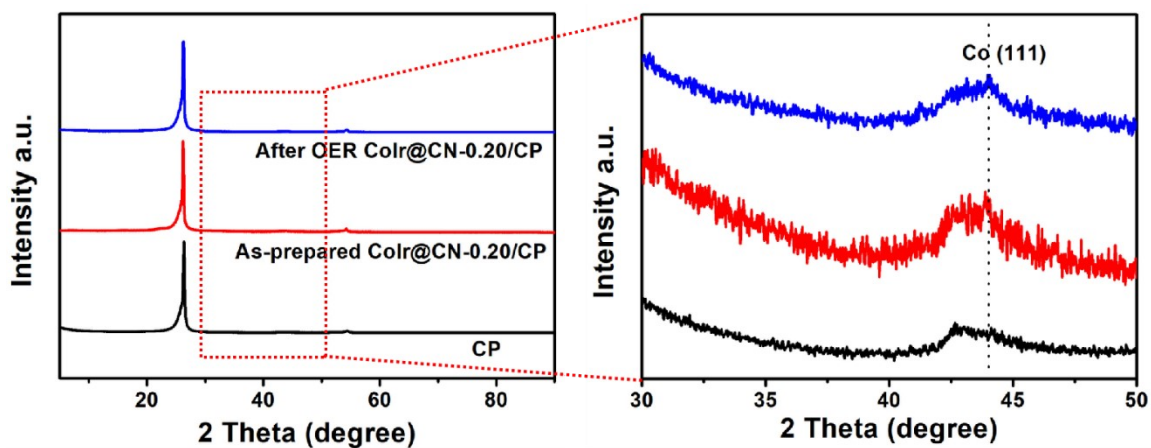

Figure S10. XRD pattern of CoIr@CN-0.20 loaded on carbon paper before and after the long-term OER reaction in 1.0 M KOH.

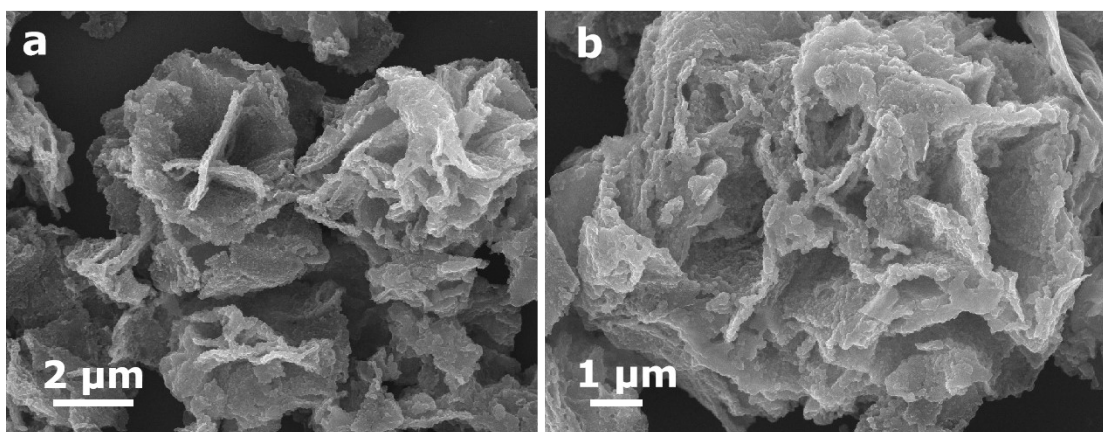

Figure S11. SEM images of CoIr@CN-0.20 after the long-term OER reaction.

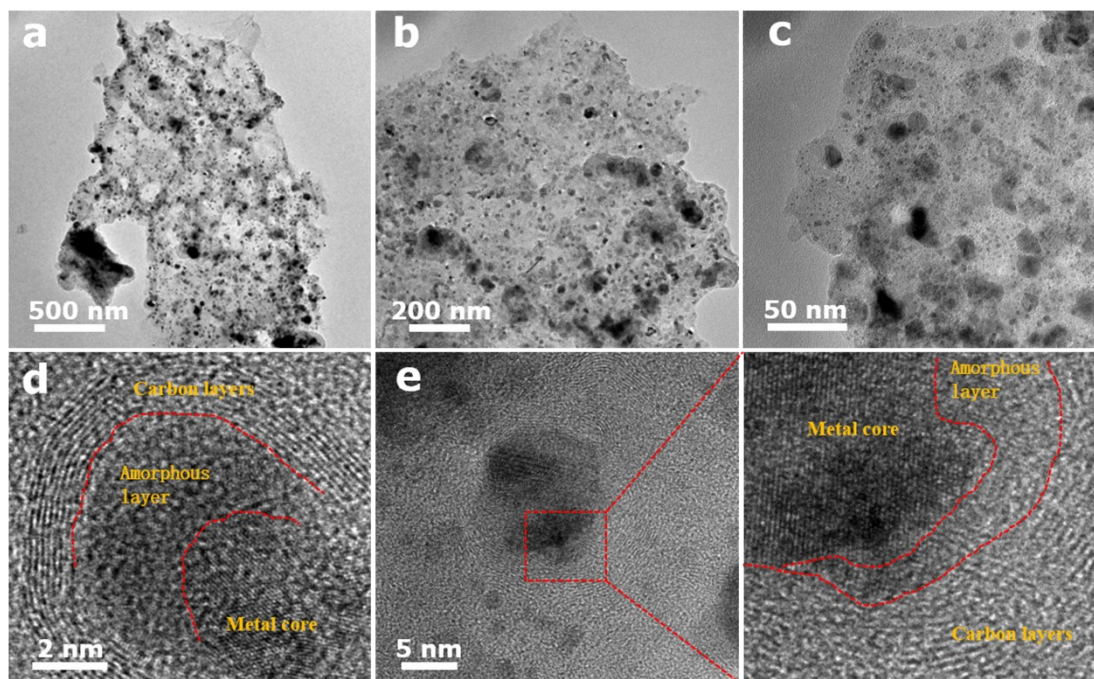

Figure S12. (a-c) Low-magnification TEM and (d, e) High-magnification TEM images of after-OER CoIr@CN-0.20.

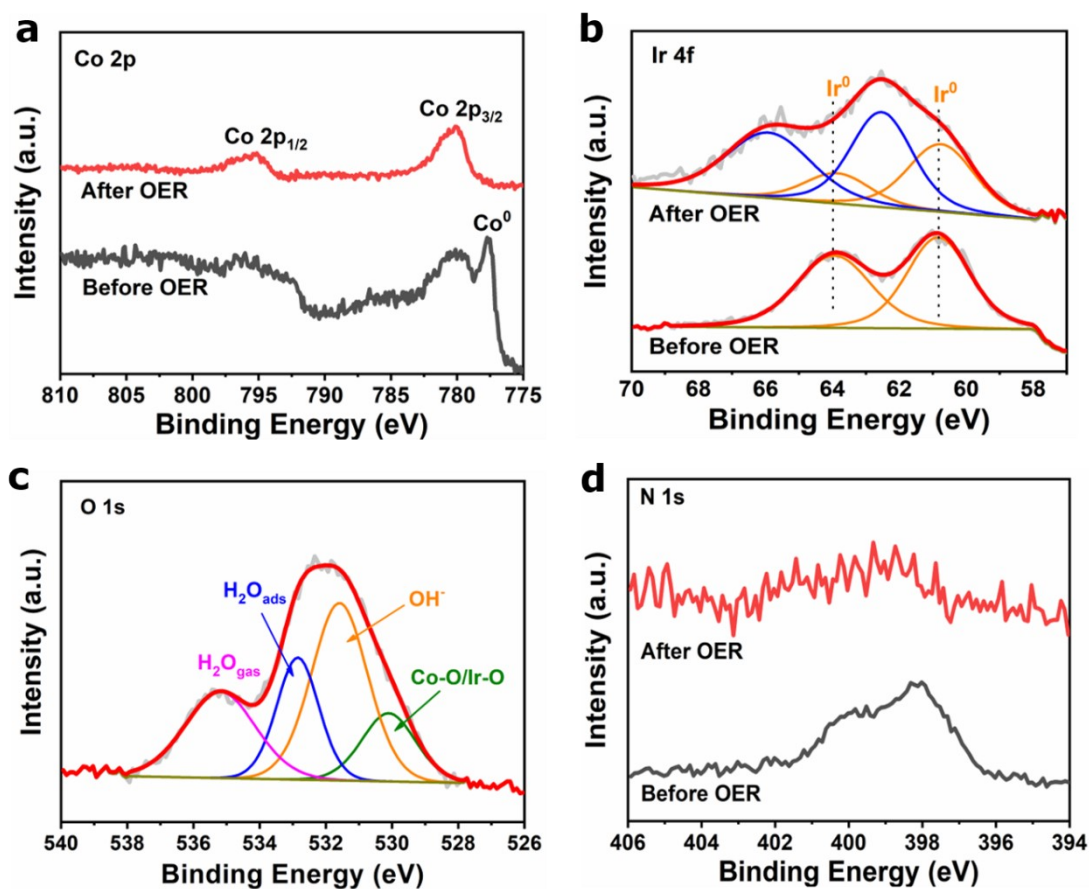

Figure S13. XPS spectra of CoIr@CN-0.20 after long-term OER experiment.

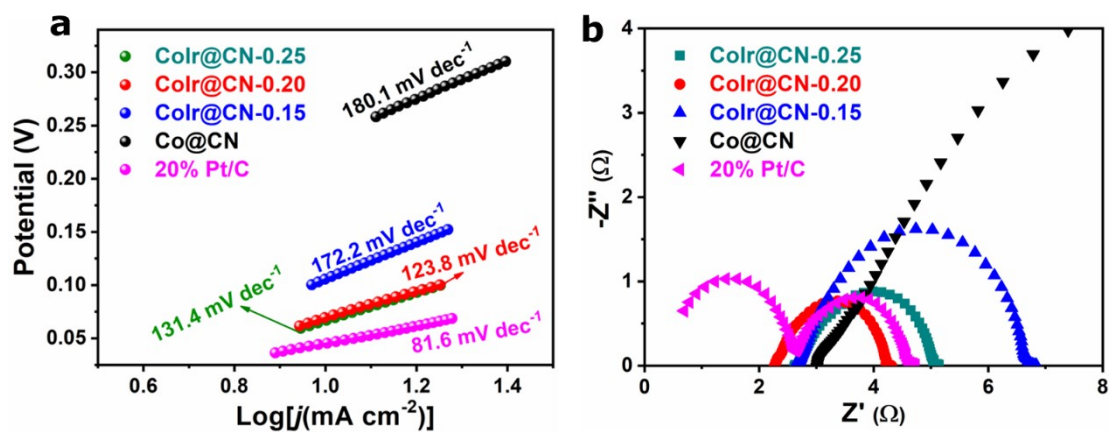

Figure S14. (a) Tafel slope calculated from LSV curves and (b) EIS test in 1.0 M KOH for HER.



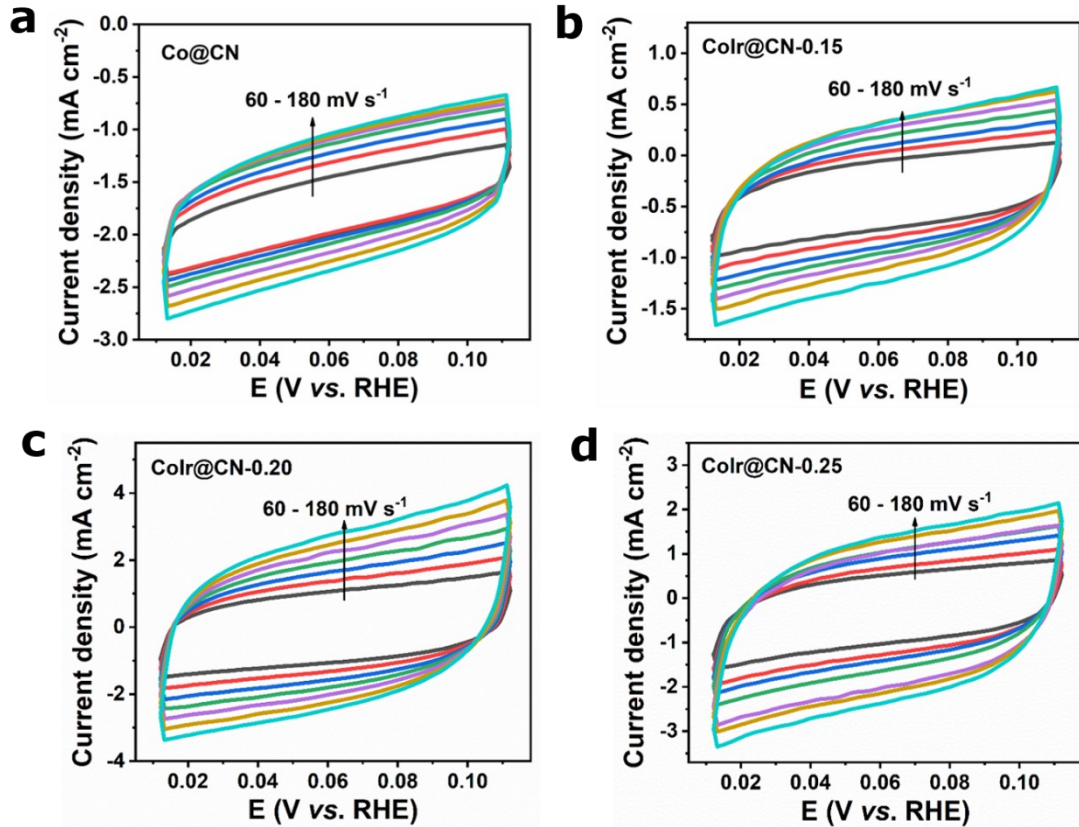

Figure S15. CVs curve of (a) Co@CN, (b) CoIr@CN-0.15, (c) CoIr@CN-0.20, and (d) CoIr@CN-0.25 in 1.0 M KOH for HER.

The corresponding ECSA caculated from  $C_{dl}$ :

$$ECSA_{Co@CN} = \frac{3.12 \text{ mF cm}^{-2}}{40 \text{ } \mu\text{F cm}^{-2}} = 78.00 \text{ cm}^2$$

$$ECSA_{CoIr@CN-0.15} = \frac{3.72 \text{ mF cm}^{-2}}{40 \text{ } \mu\text{F cm}^{-2}} = 93.00 \text{ cm}^2$$

$$ECSA_{CoIr@CN-0.20} = \frac{12.75 \text{ mF cm}^{-2}}{40 \text{ } \mu\text{F cm}^{-2}} = 318.75 \text{ cm}^2$$

$$ECSA_{CoIr@CN-0.25} = \frac{9.16 \text{ mF cm}^{-2}}{40 \text{ } \mu\text{F cm}^{-2}} = 229 \text{ cm}^2$$

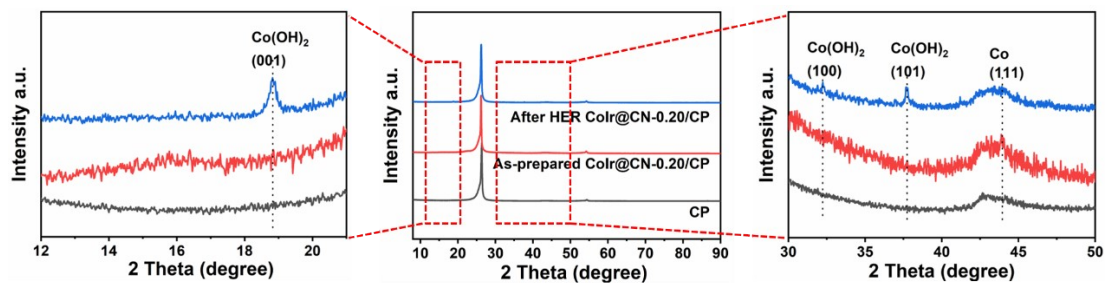

Figure S16. XRD pattern of CoIr@CN-0.20 loaded on carbon paper before and after the long-term HER reaction in 1.0 M KOH.

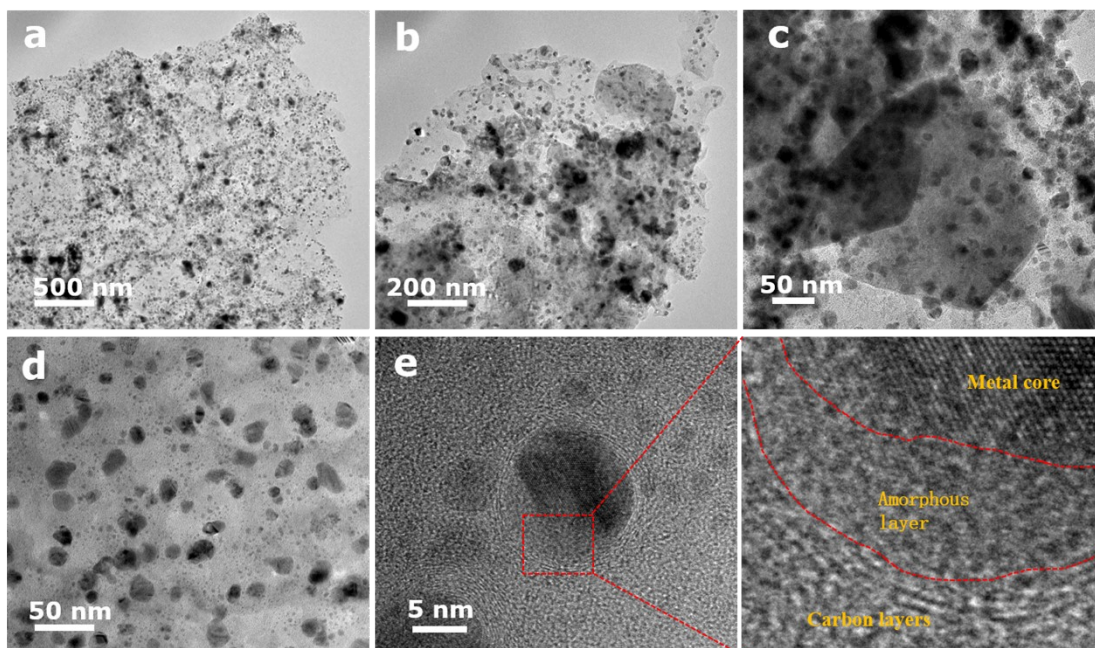

Figure S17. (a-d) Low-magnification TEM and (e) High-magnification TEM images of after-HER CoIr@CN-0.20 in 1.0 M KOH.

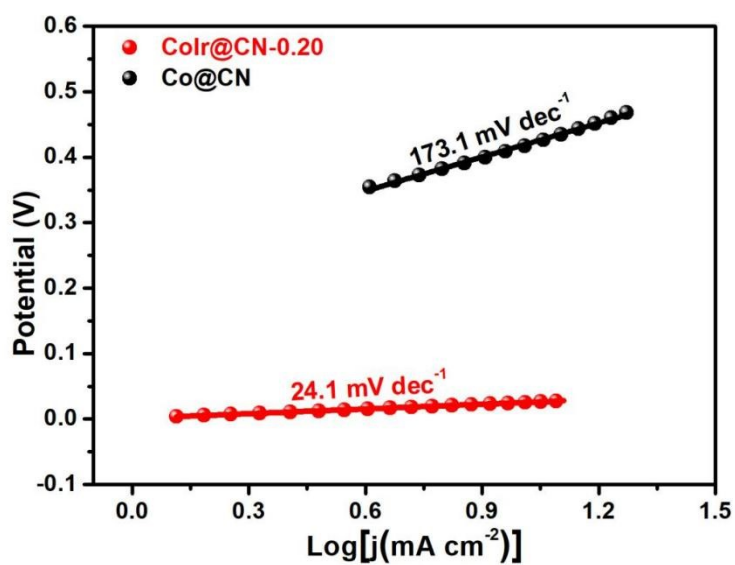

Figure S18. Tafel slope calculated from LSV curves of Co@CN and CoIr@CN-0.20 in 0.5 M H<sub>2</sub>SO<sub>4</sub> for HER.

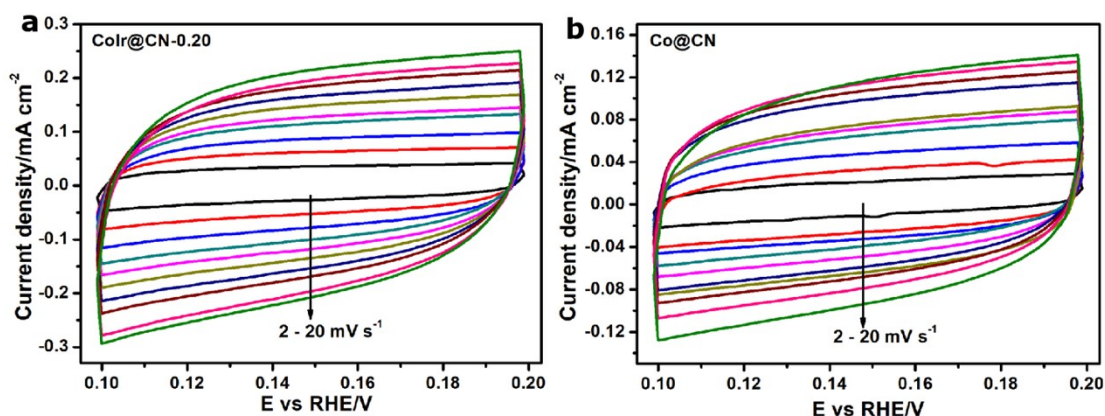

Figure S19. CVs curve of (a) CoIr@CN-0.20 and (b) Co@CN in 0.5 M H<sub>2</sub>SO<sub>4</sub> for HER.

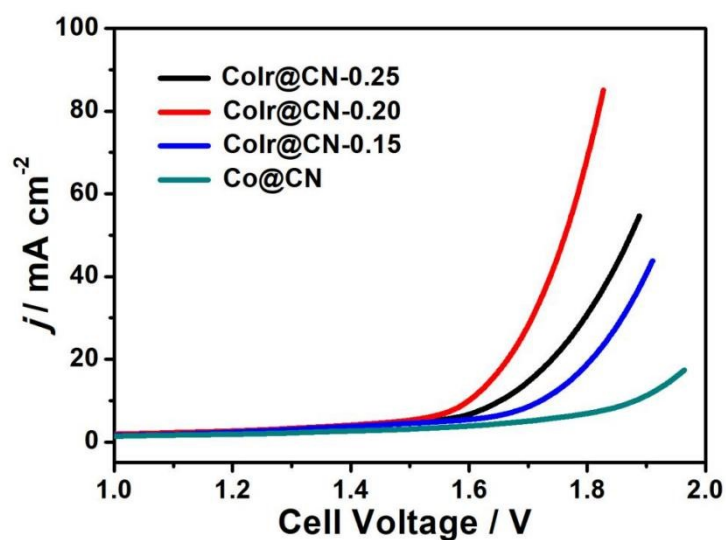

Figure S20. LSV polarization curves of the Co@CN and CoIr@CN-x (x= 0.15, 0.20, 0.25) for water splitting in 1.0 M KOH solution.

Table S1. Loading amount of Co and Ir in Co@CN, CoIr@CN-0.15, CoIr@CN-0.20, and CoIr@CN-0.25 characterized by ICP-MS.

| Sample       | Co (w%) | Ir (w%) | Molar ratio of Ir and Co |
|--------------|---------|---------|--------------------------|
| Co@CN        | 24.57   | 0       | 0                        |
| CoIr@CN-0.15 | 47.46   | 2.55    | 0.0165                   |
| CoIr@CN-0.20 | 47.31   | 2.69    | 0.0175                   |
| CoIr@CN-0.25 | 42.56   | 2.66    | 0.0192                   |

Table S2. BET data analysis of Co@CN, CoIr@CN-0.15, CoIr@CN-0.20, and CoIr@CN-0.25 samples.

| Sample | Specific Surface Area (m <sup>2</sup> /g) | Pore Volume (cm <sup>3</sup> /g) | Average Pore Size (nm) |
|--------|-------------------------------------------|----------------------------------|------------------------|
| Co@CN  | 276.46                                    | 0.1991                           | 2.8801                 |

|              |        |          |        |
|--------------|--------|----------|--------|
| CoIr@CN-0.15 | 95.931 | 0.054529 | 2.2737 |
| CoIr@CN-0.20 | 111.95 | 0.06389  | 2.2829 |
| CoIr@CN-0.25 | 128.62 | 0.067928 | 2.1125 |

Table S3. Mass ratios of various elements in Co@CN, CoIr@CN-0.15, CoIr@CN-0.20, and CoIr@CN-0.25 determined by XPS.

| Sample       | Co (w%) | Ir (w%) | C (w%) | N (w%) | O (w%) |
|--------------|---------|---------|--------|--------|--------|
| Co@CN        | 10.32   | -       | 64.79  | 10.89  | 9.69   |
| CoIr@CN-0.15 | 3.35    | 6.74    | 70.77  | 3.62   | 15.52  |
| CoIr@CN-0.20 | 4.69    | 12.21   | 64.73  | 5.34   | 13.03  |
| CoIr@CN-0.25 | 4.61    | 14.35   | 62.75  | 5.87   | 12.43  |

Table S4. Tafel slope, Exchange current densities ( $j_o$ ), and Relative  $j_o$  of all tested samples for OER.

| Samples                         | Tafel slope (mV dec <sup>-1</sup> ) | $j_o$ (mA cm <sup>-2</sup> ) | Relative $j_o$ |
|---------------------------------|-------------------------------------|------------------------------|----------------|
| CoIr@CN-0.25                    | 103.0                               | 0.733                        | 28.19          |
| CoIr@CN-0.20                    | 64.7                                | 0.857                        | 32.96          |
| CoIr@CN-0.15                    | 114.1                               | 0.202                        | 7.77           |
| Co@CN                           | 131.1                               | 0.026                        | 1.0            |
| the commercial RuO <sub>2</sub> | 164.8                               | 0.025                        | 0.96           |

Table S5. Tafel slope, Exchange current densities ( $j_o$ ), and Relative  $j_o$  of all tested samples for HER in 1.0 M KOH.

| Samples             | Tafel slope (mV dec <sup>-1</sup> ) | $j_o$ (mA cm <sup>-2</sup> ) | Relative $j_o$ |
|---------------------|-------------------------------------|------------------------------|----------------|
| CoIr@CN-0.25        | 131.4                               | 16.21                        | 29.47          |
| CoIr@CN-0.20        | 123.8                               | 20.40                        | 37.09          |
| CoIr@CN-0.15        | 172.2                               | 7.07                         | 12.85          |
| Co@CN               | 180.1                               | 0.55                         | 1.0            |
| the commercial Pt/C | 81.6                                | 33.11                        | 60.2           |

Table S6. Comparison of OER performance for CoIr@CN-0.20 with other reported carbon-based materials in the 1.0 M KOH.

| Catalyst                                | Electrode | Overpotential at 10 mA cm <sup>-2</sup> (mV) | Tafel slope (mV dec <sup>-1</sup> ) | Reference |
|-----------------------------------------|-----------|----------------------------------------------|-------------------------------------|-----------|
| CoIr@CN-0.20                            | CP        | 269                                          | 61.4                                | This work |
| Co <sub>3</sub> O <sub>4</sub> /CN HNPs | GCE       | 280                                          | 59                                  | 1         |
| Fe-Co-CN/rGO-700                        | GCE       | 308                                          | 38                                  | 2         |
| hcp-Co@NC                               | GCE       | 290                                          | 68.2                                | 3         |
| Co-CN hybrids                           | CP        | 287                                          | 63.8                                | 4         |
| Ir/CN                                   | GCE       | 265                                          | 35                                  | 5         |
| CoO <sub>x</sub> @CN                    | GCE       | 260                                          | -                                   | 6         |
| RuNi <sub>1</sub> Co <sub>1</sub> @CMT  | CC        | 299                                          | 83                                  | 7         |

|                                 |     |     |      |    |
|---------------------------------|-----|-----|------|----|
| Co@Ir/NC-10%                    | GCE | 280 | 73.8 | 8  |
| C@NiCo nanospheres              | GCE | 330 | 157  | 9  |
| CoP(MoP)-CoMoO <sub>3</sub> @CN | GCE | 296 | 105  | 10 |
| Co@N-CNTF                       | GCE | 350 | 61.4 | 13 |

Table S7. Comparison of HER performance for CoIr@CN-0.20 with other reported carbon-based materials in the 1 M KOH or 0.5 M H<sub>2</sub>SO<sub>4</sub>.

| Catalyst                               | Electrode    | Electrolyte                          | Potential at 10 mA cm <sup>-2</sup> (mV) | Tafel slope (mV dec <sup>-1</sup> ) | Reference |
|----------------------------------------|--------------|--------------------------------------|------------------------------------------|-------------------------------------|-----------|
| CoIr@CN-0.20                           | CP           | 1 M KOH                              | 70                                       | 123.8                               | This work |
| CoIr@CN-0.20                           | CP           | 0.5 M H <sub>2</sub> SO <sub>4</sub> | 25                                       | 24.1                                | This work |
| Fe-Co-CN/rGO-700                       | GCE          | 1 M KOH                              | 215                                      | 54                                  | 2         |
| hcp-Co@NC                              | GCE          | 1 M KOH                              | 90                                       | 90.7                                | 3         |
| RuNi <sub>1</sub> Co <sub>1</sub> @CMT | carbon cloth | 1 M KOH                              | 78                                       | 77                                  | 7         |
| Co@Ir/NC-10%                           | GCE          | 1 M KOH                              | 121                                      | 38                                  | 8         |
| C@NiCo nanospheres                     | GCE          | 1 M KOH                              | 105                                      | 106                                 | 9         |
| CoP(MoP)-CoMoO <sub>3</sub> @CN        | GCE          | 1 M KOH                              | 198                                      | 95                                  | 10        |
| G@Co-W-P                               | GCE          | 1 M KOH                              | 102.3                                    | 61.2                                | 11        |
| G@Co-W-P                               | GCE          | 0.5 M H <sub>2</sub> SO <sub>4</sub> | 91.5                                     | 40.7                                | 11        |
| IrCo@NC-500                            | GCE          | 1 M KOH                              | 45                                       | 80                                  | 12        |
| IrCo@NC-500                            | GCE          | 0.5 M H <sub>2</sub> SO <sub>4</sub> | 24                                       | 23                                  | 12        |
| Co@N-CNTF                              | GCE          | 1 M KOH                              | 226                                      | -                                   | 13        |
| Co@N-CNTF                              | GCE          | 0.5 M H <sub>2</sub> SO <sub>4</sub> | 220                                      | -                                   | 13        |

## References

- [1] X. Chen, Y. Chen, X. Luo, H. Guo, N. Wang, D. Su, C. Zhang, T. Liu, G. Wang, L. Cui, *Appl. Surf. Sci.*, 2020, **526**, 14662.
- [2] W. Fang, J. Wang, Y. Hu, X. Cui, R. Zhu, Y. Zhang, C. Yue, J. Dang, W. Cui, H. Zhao, Z. Li, *Electrochim. Acta*, 2021, **365**, 137384.
- [3] N. Li, H. Tan, X. Ding, H. Duan, W. Hu, G. Li, Q. Ji, Y. Lu, Y. Wang, F. Hu, C. Wang, W. Cheng, Z. Sun, W. Yan, *Appl. Catal. B-Environ.*, 2020, **266**, 118621.
- [4] X. Wang, M. Liu, H. Zhang, S. Yan, C. Zhang, S. Liu, *Nano Res.*, 2021, **14**, 4569-4576.
- [5] H. Wang, M. Ming, M. Hu, C. Xu, Y. Wang, Y. Zhang, D. Gao, J. Bi, G. Fan, J.S. Hu, *ACS Appl. Mater. Interfaces*, 2018, **10**, 22340-22347.
- [6] H. Jin, J. Wang, D. Su, Z. Wei, Z. Pang, Y. Wang, *J. Am. Chem. Soc.*, 2015, **137**, 2688.
- [7] Y. Xue, Q. Yan, X. Bai, Y. Xu, X. Zhang, Y. Li, K. Zhu, K. Ye, J. Yan, D. Cao, G. Wang, *J. Colloid Interface Sci.*, 2022, **612**, 710.
- [8] D. Li, Z. Zong, Z. Tang, Z. Liu, S. Chen, Y. Tian, X. Wang, *ACS Sustainable Chem. Eng.*, 2018, **6**, 5105-5114.
- [9] S. Tan, W. Ouyang, Y. Ji, Q. Hong, *J. Alloy. Compd.*, 2021, **889**, 161528.
- [10] L. Yu, Y. Xiao, C. Luan, J. Yang, H. Qiao, Y. Wang, X. Zhang, X. Dai, Y. Yang, H. Zhao, *ACS Appl. Mater. Interfaces*, 2019, **11**, 6890-6899.
- [11] X. Wang, J.B. Le, Y. Fei, R. Gao, M. Jing, W. Yuan, C.M. Li, *J. Mater. Chem. A*, 2022, **10**, 7694-7704.
- [12] P. Jiang, J. Chen, C. Wang, K. Yang, S. Gong, S. Liu, Z. Lin, M. Li, G. Xia, Y. Yang, J. Su, Q. Chen, *Adv. Mater.*, 2018, **30**, 1705324.
- [13] H. Guo, Q. Feng, J. Zhu, J. Xu, Q. Li, S. Liu, K. Xu, C. Zhang, T. Liu, *J. Mater. Chem. A*, 2019, **7**, 3664-3672.
